# Supplementary material for: Blood pressure in girls with central precocious puberty receiving GnRH analogue therapy
Source: publisher site journal article supplement (doi:10.1515/jpem-2023-0118), 2023-07-01
Supplement: Supplementary file 1 [file j_jpem-2023-0118_suppl_001.docx]

APPENDIX 1

We created our own model for height data (n=9), based on Center for Disease Control (CDC) height charts and the 2017 guidelines for blood pressure issued by the American Academy of Pediatrics. Height outliers were included to display a realistic representation of girls with CPP who are often tall for age. The model was done by cubic interpolation, using an extrapolation for height outliers. Note that while cubic extrapolation (and other spline methods) performs better for interpolation, it may result in a considerable deviation from the correct values when the measured values are far from the CDC diagram boundaries. Thus, we used the more moderate linear extrapolation method. Linear interpolation may also result in non-realistic values. For the latter we manually evaluated percentiles. Next, using blood pressure diagrams, we interpolated the pressure values for the already interpolated height percentile values. The above extrapolation and interpolation considerations were also applied here. Finally, we calculated the blood pressure percentiles.  As before, deviations from the normal diagram values were common.
